# Supplementary material for: Actionable pharmacogenetic variants in Hong Kong Chinese exome sequencing data and projected prescription impact in the Hong Kong population
Source: PLoS Genet. 2021 Feb 18;17(2):e1009323. doi: 10.1371/journal.pgen.1009323 (PMC7891783; doi:10.1371/journal.pgen.1009323)
Supplement: S6 Table — AFHK, allele frequency in Hong Kong. aData from Hong Kong Bone Marrow Donor Registry (HKBMDR)[34]; bData from Chinese Bone Marrow Donor Program (CBMD)[37]. (XLSX) [file pgen.1009323.s007.xlsx]

## Sheet: Sheet1
Table S6. Table of actionable HLA risk alleles identified in the Hong Kong Chinese exome sequencing cohort
Gene	Allele	Call rate	Heterozygous	Homozygous	AFHK	AFHKBMDRa	AFCBMDb	Drug(s)
HLA-A	*31:01:02	1	28	0	0.0125	0.015	0.0328	Carbamazepine, oxcarbazepine
HLA-B	*15:02:01	1	192	12	0.0968	0.0938	0.0355	Carbamazepine, oxcarbazepine, phenytoin
HLA-B	*58:01	1	181	9	0.0892	0.0887	0.0615	Allopurinol
HLA-B	*57:01:01	1	2	0	0.0009	0.0022	0.0117	Abacavir
AFHK, allele frequency in Hong Kong
aData from Hong Kong Bone Marrow Donor Registry (HKBMDR);[1] bData from Chinese Bone Marrow Donor Program (CBMD)[2]
Reference
1. Kwok J, Guo M, Yang W, Lee CK, Ho J, Tang WH, et al. HLA-A, -B, -C, and -DRB1 genotyping and haplotype frequencies for a Hong Kong Chinese population of 7595 individuals. Hum Immunol. 2016;77(12):1111-2. Epub 2016/10/25. doi: 10.1016/j.humimm.2016.10.005. PubMed PMID: 27769748.
2. He Y, Li J, Mao W, Zhang D, Liu M, Shan X, et al. HLA common and well-documented alleles in China. Hla. 2018;92(4):199-205. Epub 2018/08/04. doi: 10.1111/tan.13358. PubMed PMID: 30073798.
