# Supplementary material for: Actionable pharmacogenetic variants in Hong Kong Chinese exome sequencing data and projected prescription impact in the Hong Kong population
Source: PLoS Genet. 2021 Feb 18;17(2):e1009323. doi: 10.1371/journal.pgen.1009323 (PMC7891783; doi:10.1371/journal.pgen.1009323)
Supplement: S7 Table — aCarrier rate of G6PD deficiency projected from male-female ratio of 45.6:54.4 in Hong Kong. bVariants include p.(Arg74Trp) and p.(Arg117His). Cystic fibrosis is uncommon in Chinese, hence Ivacaftor is not prescribed in public healthcare systems. UM, ultrarapid metabolizer; IM, intermediate metabolizer; EM, extensive metabolizer; PM, poor metabolizer. (XLSX) [file pgen.1009323.s008.xlsx]

## Sheet: 工作表1
Table S7. Frequency of actionable phenotype(s) and projected impact for each drug
Drug	Actionable phenotype(s)	Total frequency (%)	Projected impact
			Affected headcount	Affected expenditure (USD)
Drugs with prescription data in Hong Kong public healthcare system
Clopidogrel	CYP2C19 IM/PM	0.5721	263,04	332249
Tacrolimus	CYP3A5 EM/IM	0.4338	1813	4300996
Warfarin	CYP4F2 carrier of reduced function allele, CYP2C9 IM/PM	0.4313	10280	266915
Efavirenz	CYP2B6 IM/PM	0.4051	217	71746
Simvastatin	SLCO1B1 intermediate/ low function	0.2581	146167	709732
Phenytoin	CYP2C9 IM/PM,	0.2282	3013	585695
	HLA-B*15:02 carrier
Amitriptyline	CYP2C19 PM,	0.2274	5586	26275
	CYP2D6 UM/IM/PM
Doxepin	CYP2C19 PM,	0.2274	143	21687
	CYP2D6 UM/IM/PM
Clomipramine	CYP2C19 PM,	0.2274	202	18685
	CYP2D6 UM/IM/PM
Trimipramine	CYP2C19 PM,	0.2274	107	12969
	CYP2D6 UM/IM/PM
Imipramine	CYP2C19 PM,	0.2274	312	8127
	CYP2D6 UM/IM/PM
Azathioprine	TPMT IM/PM, NUDT15 IM/PM	0.2098	1420	94647
Mercaptopurine	TPMT IM/PM, NUDT15 IM/PM	0.2098	55	47649
Thioguanine	TPMT IM/PM, NUDT15 IM/PM	0.2098	14	5567
Carbamazepine	HLA-A*31:01 carrier, HLA-B*15:02 carrier	0.2045	1580	231819
Oxcarbazepine	HLA-B*15:02 carrier	0.1842	183	95895
Allopurinol	HLA-B*58:01 carrier	0.1704	10438	83564
Peginterferon Alfa-2A	IFNL3 unfavorable response genotype	0.1357	33	50748
Ribavirin	IFNL3 unfavorable response genotype	0.1357	20	6981
Atomoxetine	CYP2D6 UM/IM/PM	0.1224	262	55675
Nortriptyline	CYP2D6 UM/IM/PM	0.1224	322	22687
Escitalopram	CYP2C19 PM	0.1196	1592	777481
Voriconazole	CYP2C19 PM	0.1196	43	134396
Sertraline	CYP2C19 PM	0.1196	5366	65580
Citalopram	CYP2C19 PM	0.1196	1723	18858
Tamoxifen	CYP2D6 IM, PM	0.0894	858	41860
Celecoxib	CYP2D6 IM, PM	0.0539	831	26298
Ibuprofen	CYP2D6 IM, PM	0.0539	12000	15135
Piroxicam	CYP2D6 IM, PM	0.0539	24	671
Atazanavir	UGT1A1 PM	0.0508	14	41061
Paroxetine	CYP2D6 UM, PM	0.037	384	21283
Codeine	CYP2D6 UM/PM	0.037	272	4944
Ondansetron	CYP2D6 UM	0.033	728	13449
Rasburicase	G6PD deficient	0.0175	5	5777
Fluvoxamine	CYP2D6 PM	0.004	1	321
Abacavir	HLA-B*57:01 carrier	0.0018	0	1259
Drugs without prescription data in Hong Kong public healthcare system
Flurbiprofen	CYP2C9 IM/PM	0.5721	Not applicable
Lornoxicam	CYP2C9 IM/PM	0.5721
Meloxicam	CYP2C9 IM/PM	0.5721
Tenoxicam	CYP2C9 IM/PM	0.5721
Desipramine	CYP2C19 PM,	0.227
	CYP2D6 UM/IM/PM
Peginterferon alfa-2b	IFNL3 unfavourable response genotype	0.1357
Tropisetron	CYP2D6 UM	0.033
Ivacaftor	FDA-approved drug label for Ivacaftorb	0.0018
aCarrier rate of G6PD deficiency projected from male-female ratio of 45.6:54.4 in Hong Kong.
bVariants include p.(Arg74Trp) and p.(Arg117His). Cystic fibrosis is uncommon in Chinese, hence Ivacaftor is not prescribed in public healthcare systems.
UM, ultrarapid metabolizer; IM, intermediate metabolizer; EM, extensive metabolizer; PM, poor metabolizer
