# Supplementary material for: Actionable pharmacogenetic variants in Hong Kong Chinese exome sequencing data and projected prescription impact in the Hong Kong population
Source: PLoS Genet. 2021 Feb 18;17(2):e1009323. doi: 10.1371/journal.pgen.1009323 (PMC7891783; doi:10.1371/journal.pgen.1009323)
Supplement: S8 Table — Based on the available prescription data in CDARS in 2019, a total of 1,006,046 Hong Kong Chinese patients had received at least one of the 36 drugs with CPIC guideline recommendations, representing 13.4% of the Hong Kong population. The percentage of people prescribed with one of the 36 drugs with CPIC guideline recommendations increased with age. (XLSX) [file pgen.1009323.s009.xlsx]

## Sheet: Sheet1
Table S8. The number and percentage of people prescribed with one of the 36 drugs with CPIC guideline recommendation in different age group
Age group	No. of people prescribed with one of the 36 drugs with CPIC guideline recommendations	Total Hong Kong population of the specified age group (×103)	Percentage of people prescribed with one of the 36 drugs with CPIC guideline recommendations in the specified age group (%)
Age not available	327	N/A	N/A
0 - 4	11358	272.1	4.2
5 - 9	7036	307.9	2.3
10 -14	7543	300.7	2.5
15 - 19	9873	281.1	3.5
20 - 24	12952	394.2	3.3
25 - 29	18280	487.1	3.8
30 - 34	21541	554.5	3.9
35 - 39	26826	611.5	4.4
40 - 44	34866	569.8	6.1
45 - 49	50056	584.4	8.6
50 - 54	74800	551.7	13.6
55 - 59	114036	650.1	17.5
60 - 64	136746	581.9	23.5
65 - 69	136622	448.5	30.5
70 - 74	105335	324.2	32.5
75 - 79	79402	191.1	41.5
80 - 84	74675	174.1	42.9
>85	83773	215.8	38.8
Total	1006047	7500.7	13.4
Based on the available prescription data in CDARS in 2019, a total of 1,006,046 Hong Kong Chinese patients had received at least one of the 36 drugs with CPIC guideline recommendations, representing 13.4% of the Hong Kong population. The percentage of people prescribed with one of the 36 drugs with CPIC guideline recommendations increased with age.
